# Supplementary material for: Insecticide resistance in Aedes aegypti from Tapachula, Mexico: Spatial variation and response to historical insecticide use
Source: PubMed Central journal article supplement (PMC8475978; doi:10.1371/journal.pntd.0009746), 2021-09-27

19 <sup>5</sup> Centers for Diseases Prevention and Control, Arboviral Diseases Branch, Fort  
20 Collins, Colorado, U.S., 80523.

21 † Deceased

22 \* Corresponding author

23 E-mail: [penilla@insp.mx](mailto:penilla@insp.mx) (RPPN)

24

## 25 **Abstract**

26 Background. Insecticide use continues as the main strategy to control *Aedes*  
27 *aegypti*, the vector of dengue, zika, chikungunya, and yellow fever. In the city of  
28 Tapachula, Mexico, mosquito control programs switched from pyrethroids to  
29 organophosphates for outdoor spatial spraying in 2013. Additionally, the spraying  
30 scheme switched from total coverage to focused control, prioritizing areas with  
31 higher entomological-virological risk. Five years after this strategy had been  
32 implemented, we evaluated the status and variability of insecticide resistance among  
33 *Ae. aegypti* collected at 26 sites in Tapachula.

34 Methodology/Principal findings. We determined the lethal concentrations 50% of the  
35 tested populations (LC<sub>50</sub>) using a bottle bioassay, and then, we calculated the  
36 resistance ratio (RR) relative to the susceptible New Orleans strain. Permethrin and  
37 deltamethrin (pyrethroids), chlorpyrifos and malathion (organophosphates), and  
38 bendiocarb (carbamate) were tested. The frequencies of the substitutions V1016I  
39 and F1534C, which are in the voltage-gated sodium channel and confer knockdown-

40 resistance (*kdr*) to pyrethroid insecticides, were calculated. Despite 5 years having  
41 passed since the removal of pyrethroids ~~in~~ <sup>from the</sup> control programs, *Ae. aegypti* remained  
42 highly resistant to permethrin and deltamethrin (RR > 10-fold). In addition, following  
43 5 years of chlorpyrifos use, mosquitoes at 15 of 26 sites showed moderate  
44 resistance to chlorpyrifos (5- to 10-fold), and the mosquitoes from one site were  
45 highly resistant. All sites had low resistance to malathion (< 5-fold). Resistance to  
46 bendiocarb was low at 19 sites, moderate at five, and high at two. Frequencies of  
47 the V1016I ranged from 0.16– 0.71, while C1534 approached fixation at 23 sites  
48 (0.8–1). Resistance profiles and *kdr* allele frequencies varied across Tapachula. The  
49 variability was not associated with a spatial pattern at the scale of the sampling.

50 Conclusion/Significance. Mosquito populations respond to selection pressure at a  
51 focal scale in the field. Spatial variation across sites highlights the importance of  
52 testing multiple sites within geographical regions.

53

54 **Keywords:** *Aedes aegypti*; insecticide resistance; spatial variation; Mexico.

55

Excellent, the clarity and rigor of the manuscript  
is much improved. Nominal minor edits:

- 'Type I and II' typically precede pyrethroid (Line 331-353-354)
- please italicize *kdr* throughout
- Line 401: (37 Grossman) should be changed to [37].

Recommend acceptance

56 **Author summary**

57 *Aedes aegypti* is a major vector of dengue, chikungunya, zika, and yellow  
58 fever. In the absence of effective vaccines or treatments, the suppression of  
59 mosquito populations using insecticides commonly has been implemented by public  
60 health programs. Unfortunately, few insecticides are available to target adult  
61 mosquitoes with outdoor spraying. The mismanagement of insecticides can lead to  
62 resistance selection in mosquitoes, affecting our ability to control arboviral diseases.  
63 Ideally, screening insecticide susceptibility in local mosquito populations allows  
64 public health entities to support insecticide management strategies that will prevent  
65 the development of resistance. In this study, we evaluated insecticide resistance in  
66 *Ae. aegypti* collected across 26 sites in Tapachula, Mexico. The results reveal the  
67 response of populations to its historic use of insecticides. High resistance to  
68 pyrethroids, used for 10 years, but not in the previous 5 years, and moderate to high  
69 resistance to chlorpyrifos, an insecticide from a different toxicological group and  
70 used for the past 5 years, were confirmed. High variation in resistance across *Ae.*  
71 *aegypti* sites suggests that focal selection plays an important role in the evolution of  
72 insecticide resistance in the field. Screening several collections sites within a  
73 geographical region provides better evidence to support strategies of insecticide  
74 management.

75



## 76 **Introduction**

77 *Aedes aegypti* is the main vector of several arboviruses, including dengue,  
78 zika, chikungunya, and yellow fever. The control of this mosquito species is  
79 challenging, mainly because it is highly adapted to urban and suburban areas and  
80 because it is widely dispersed in endemic regions [1]. Except for yellow fever, safe  
81 and effective treatments or vaccines for these diseases are still under study.  
82 Therefore, the suppression of *Ae. aegypti* remains the cornerstone to prevent  
83 transmission and control of outbreaks of these diseases [2].

84 Effective vector control involves several strategies, such as the elimination  
85 of potential breeding sites, application of chemical insecticides, and implementation  
86 of biological control. However, the application of chemical insecticides has become  
87 a common form of control because such control is highly efficient and can be  
88 implemented promptly [3]. The most used insecticides in vector control have been  
89 the organophosphates temephos, used as a larvicide, and malathion, used as an  
90 adulticide by ultra-low volume application (ULV). Pyrethroids were introduced as  
91 adulticides in most Latin American countries in the 1990s [3]. In Mexico, according  
92 to the Mexican official policy for vector surveillance and control [4], the adulticide  
93 ULV formulation of permethrin, bioallethrin, and piperonyl butoxide (PBO) was used  
94 for more than 10 consecutive years (1999–2010). In the following 3–4 years, the  
95 pyrethroid d-phenothrin + PBO was introduced. Subsequently, the use of  
96 organophosphates returned in 2013, with chlorpyrifos and malathion being used as  
97 adulticides, while carbamates were recommended for indoor residual application [5].

98           The prolonged use of pyrethroid insecticides resulted in the evolution of  
99 resistance to them in *Ae. aegypti* worldwide, including Mexico, where failures in  
100 dengue control strategies are due in part to resistance [5]. Given that resistance to  
101 insecticides has been reported in populations of *Ae. aegypti* globally, the World  
102 Health Organization (WHO) recommends testing to ensure an effective insecticide  
103 management program. Decisions based on evidence of the resistance and/or  
104 susceptibility of *Ae. aegypti* will ensure a better selection of insecticides in vector  
105 control programs [6].

106           Two mechanisms of resistance to insecticides have been identified:  
107 resistance due to the enhanced metabolism of insecticides and insensitivity at the  
108 target site of the insecticides. Both mechanisms are involved in resistance to  
109 pyrethroids [7]. Knockdown resistance (*kdr*) refers to a phenomenon in which insects  
110 are not knocked down immediately after exposure to pyrethroids. *kdr* is caused by  
111 specific mutations at the voltage-gated sodium channel (VGSC), which is the target  
112 site for pyrethroids and DDT [8]. The amino acid substitutions V1016I [9], F1534C  
113 [10], and V410L [11,12] frequently have been associated with resistance to  
114 pyrethroids. Once these mutations are fixed in a population, reversion to  
115 susceptibility is difficult to achieve [9]. Therefore, the detection and characterization  
116 of *kdr* mutations in mosquito populations before resistance fixation occurs is  
117 essential for insecticide management strategies.

118           In Mexico, Chiapas is one of the states with the highest rate of endemic  
119 dengue cases. In particular, the city of Tapachula reports the highest incidence of  
120 dengue in the state [13], which is attributed to the proliferation of vectors that transmit

121 emerging and re-emerging diseases. Under the region's tropical climate conditions,  
122 *Ae. aegypti* maintains high densities throughout the year. Consequently, dengue and  
123 other arboviruses transmitted by this vector have been prevalent in the region for a  
124 long time [14].

125 In the context of insecticide resistance management, we investigated the  
126 status of insecticide resistance to five insecticides, including two pyrethroids  
127 (permethrin and deltamethrin), two organophosphates (chlorpyrifos and malathion),  
128 and one carbamate (bendiocarb) and the spatial distribution of such resistance in  
129 populations of *Ae. aegypti* throughout the city of Tapachula. We expect that after 5  
130 years of heavy use of organophosphates and the removal of pyrethroids from vector  
131 control campaigns, pyrethroid resistance will be lower, whereas organophosphate  
132 resistance will appear in focal points of the city. We tested 26 collection sites located  
133 in the city of Tapachula. Each collection site consisted in <sup>of</sup> nine blocks and these were  
134 selected based on vehicle access for outdoor spraying. To minimize the effects of  
135 mosquito migration by flight range (50 - 150 m), sites were located at least 250 m  
136 apart. The spatial correlation between resistance and geographical distance was  
137 calculated for the 26 collection sites. In addition, since Tapachula's vector control  
138 program uses a quadrant subdivision for spraying activities, we included a second  
139 analysis to test this source of variation by assigning sites to one of the four cardinal  
140 geographical quadrants (NE, NW, SE, and SW).

141

## 142 **Materials and methods**

143           **Collections.** The study was conducted in the city of Tapachula, Chiapas,  
144 located in southern Mexico at 177 meters above sea level. The 26 collection sites  
145 located in four quadrants in the city: Northwest (NW), Northeast (NE), Southwest  
146 (SW), and Southeast (SE) are shown in Table 1. The biological material was  
147 collected from January to April 2018 using ovitraps of 1-L capacity [15]. Twelve  
148 ovitraps were installed at each collection site. Ovitrap were made by hand with  
149 transparent, inert, non-toxic polypropylene (PP) cups of a 1 L capacity, and painted  
150 black on the outside following the guidelines for Entomological Surveillance with  
151 Ovitrap of the Mexican Ministry of Health (15). The interior of each ovitrap was lined  
152 with Whatman filter paper (No. 1) and filled with water to ¾ capacity; the paper was  
153 replaced weekly up to five times. The egg strips were transported to the insectary of  
154 the Regional Center for Research in Public Health/National Institute of Public Health  
155 (CRISP/INSP). The egg strips were submerged in 4 L of water in plastic containers  
156 (40 cm x 30 cm x 15 cm). On the third and sixth day, the hatched larvae were fed a  
157 diet of Harlan 5001 proteins, with 0.4 gr or 0.8 gr / 1.2 L for 1<sup>st</sup>-2<sup>nd</sup> stadium and 3<sup>rd</sup>-  
158 4<sup>th</sup> stadium at the 3<sup>rd</sup> and 6<sup>th</sup> day, respectively.

159

160 **Table 1.** Geographic location of 26 *Aedes aegypti* collection sites in Tapachula,  
161 Chiapas, Mexico, in 2018.

162

| Quadrant         | Site | Neighborhood    | Abbreviation | Latitude    | Longitude   |
|------------------|------|-----------------|--------------|-------------|-------------|
| <b>Northeast</b> |      |                 |              |             |             |
|                  | NE-1 | Colinas del Rey | Col          | 14°55'50.9" | 92°14'50.2" |
|                  | NE-2 | Galaxias        | Gal          | 14°55'11.2" | 92°15'06.5" |
|                  | NE-3 | Barrio Nuevo    | Bar          | 14°54'51.0" | 92°15'05.3" |

|                  |      |                       |     |             |             |
|------------------|------|-----------------------|-----|-------------|-------------|
|                  | NE-4 | San Juan de los Lagos | SJL | 14°54'26.3" | 92°15'13.4" |
|                  | NE-5 | Coapantes             | Coa | 14°54'23.0" | 92°14'57.1" |
|                  | NE-6 | Bonanza               | Bon | 14°54'02.8" | 92°14'31.7" |
|                  | NE-7 | Centro (Country-Club) | CCC | 14°54'22.7" | 92°15'32.8" |
| <b>Southeast</b> |      |                       |     |             |             |
|                  | SE-1 | Galeana               | Gal | 14°54'00.2" | 92°15'56.0" |
|                  | SE-2 | 16 de Septiembre      | 16S | 14°53'44.0" | 92°15'42.1" |
|                  | SE-3 | Calcáneo Beltrán      | Cal | 14°53'28.0" | 92°15'43.4" |
|                  | SE-4 | Benito Juárez 1       | BJ1 | 14°53'21.8" | 92°16'04.1" |
|                  | SE-5 | Benito Juárez 2       | BJ2 | 14°53'11.7" | 92°16'10.3" |
|                  | SE-6 | Emiliano Zapata       | Zap | 14°53'02.1" | 92°16'14.2" |
| <b>Southwest</b> |      |                       |     |             |             |
|                  | SW-1 | Raymundo Enríquez     | Ray | 14°52'01.4" | 92°18'48.8" |
|                  | SW-2 | Pobres Unidos         | Pob | 14°53'14.0" | 92°17'6.1"  |
|                  | SW-3 | Palmeiras             | Pal | 14°53'22.1" | 92°18'06.4" |
|                  | SW-4 | Nuevo Milenio         | Nue | 14°53'24.8" | 92°17'59.4" |
|                  | SW-5 | Primavera             | Pri | 14°53'39.3" | 92°17'38.6" |
|                  | SW-6 | Democracia            | Dem | 14°54'23.7" | 92°16'33.5" |
| <b>Northwest</b> |      |                       |     |             |             |
|                  | NW-1 | 5 de febrero          | 5Fe | 14°55'33.7" | 92°15'22.4" |
|                  | NW-2 | Xochimilco 1          | Xo1 | 14°55'48.9" | 92°15'37.8" |
|                  | NW-3 | Xochimilco 2          | Xo2 | 14°56'02.2" | 92°15'29.9" |
|                  | NW-4 | Vergel 1              | Ve1 | 14°56'21.2" | 92°15'52.4" |
|                  | NW-5 | Vergel 2              | Ve2 | 14°56'32.9" | 92°15'52.4" |
|                  | NW-6 | Paraíso               | Par | 14°56'35.2" | 92°15'19.7" |
|                  | NW-7 | Centro (Nva. España)  | CNE | 14°54'35.0" | 92°15'43.5" |

163

164 *Aedes aegypti* mosquitoes were identified to species and placed in cages  
 165 (30 cm<sup>3</sup>). Females were bloodfed from rabbit to obtain the F<sub>1</sub> generation.  
 166 Environmental conditions consisted of a temperature of 27 ± 2 °C, 70–80% humidity,  
 167 and a 12:12 hour photoperiod. We used the insecticide-susceptible New Orleans  
 168 reference strain of *Ae. aegypti*, provided by Dr. William Black and maintained in the  
 169 CRISP/INSP insectary.

170 **Bioassays.** The F<sub>1</sub> adults were exposed to the insecticides using a modified CDC  
 171 bottle bioassay (Centers for Disease Control) [16]. Sigma brand technical grade

172 insecticides were used to determine the lethal concentrations that killed 50% (LC<sub>50</sub>)  
173 at each site. The pyrethroids permethrin (Type I) and deltamethrin (Type II), the  
174 organophosphates malathion and chlorpyrifos, and the carbamate bendiocarb were  
175 used to represent the toxicological groups used by vector control programs in  
176 Mexico.

177 To determine the LC<sub>50</sub>, we tested five to six insecticide concentrations, which  
178 caused 10 to 90% mortality, in four replicates. Each insecticide LC<sub>50</sub> required  
179 approximately 500 mosquitoes. Table 2 shows the insecticide concentrations  
180 (µg/bottle) used to coat 250 ml Wheaton bottles using acetone as the solvent. During  
181 the bioassay, 15 to 20 (2-3 day old) females were gently aspirated into each bottle.  
182 The knockdown effect was recorded every 10 minutes for 1 hour. After 1 hour of  
183 exposure, the mosquitoes were transferred to plastic containers and maintained in  
184 the insectary to observe the mortality at 24 hours. The LC<sub>50</sub> of each insecticide was  
185 also determined for the susceptible New Orleans reference strain (NO) using a  
186 different set of insecticide concentrations (Table 2). Each insecticide LC<sub>50</sub> was  
187 replicated at least five times during a 7-month period. As control, a bottle  
188 impregnated only with acetone was used each time a test with field or susceptible  
189 mosquitoes was run.

190

191 **Table 2.** Concentrations (µg/bottle) used to determine the LC<sub>50</sub> of five different  
192 insecticides in the bottle bioassay for field *Aedes aegypti* and the susceptible  
193 reference strain.

| Class | Mode of action            | Insecticide  | Concentration in µg/bottle |                           |
|-------|---------------------------|--------------|----------------------------|---------------------------|
|       |                           |              | Field colonies             | New Orleans reference     |
| PYRs  | sodium channel activators | Permethrin   | 10, 20, 40, 80, 160        | 0.8, 1.2, 2.4, 3.2, 6     |
|       |                           | Deltamethrin | 1, 2, 4, 6, 8, 16          | 0.75, 0.1, 0.15, 0.2, 0.4 |
| OPs   | cholinesterase inhibitors | Malathion    | 2, 3, 4, 6, 8              | 2, 3, 4, 6, 8             |
|       |                           | Chlorpyrifos | 2, 4, 6, 8, 12             | 0.2, 0.4, 0.8, 1.6, 3.2   |
| CARBs |                           | Bendiocarb   | 0.5, 0.75, 1, 1.5, 3       | 0.25, 0.3, 0.4, 0.6, 1.2  |

194 PYRs = pyrethroids, OPs = organophosphates, CARBs = carbamates.

195 The  $LC_{50}$ , 95% confidence intervals, slope, intercept, and  $p$  values were  
 196 determined using the binary logistic regression model with QCal software [17]. The  
 197 null hypothesis ( $H_0$ ) assumes the observed mortality curve adjusts to a binary logistic  
 198 regression model. Thus, we expected  $p$  values higher than 0.05 to accept the  $H_0$ .  
 199 When the  $H_0$  was rejected, the bioassay was repeated.

200 To estimate the level of resistance among sites, a resistance ratio (RR) was  
 201 calculated by dividing the  $LC_{50}$  of the field sites by the  $LC_{50}$  of the NO strain. The RR  
 202 criterion according to Mazzarri and Georghiou [18] classifies high resistance as RR  
 203 values greater than 10, moderate resistance as RR values between 5 and 10, and  
 204 low resistance as RR values less than 5.

205 **Genotyping *kdr*-associated mutations.** Genomic DNA was isolated from 50  $F_1$   
 206 individual female mosquitoes from each collection site following the method of Black  
 207 and DuTeau [19]. The DNA was resuspended in TE buffer (10 mM Tris-HCl, 1 mM  
 208 EDTA pH 8) and stored at -20 °C. The V1016I and F1534C mutations were  
 209 genotyped according to the protocols of Saavedra-Rodríguez et al. [9] and Yanola  
 210 et al. [10], respectively. The genotype and allelic frequencies were tested for Hardy-



211 Weinberg (HW) equilibrium. The null hypothesis is that equilibrium is present in the  
212 population, which was verified with a chi-square test ( $df = 1$  and  $p$  value  $> 0.05$ ).

213 We tested the spatial variation of the  $LC_{50}$ s between the quadrants in the city  
214 using a linear model and ANOVA in R (car package). To test the hypothesis of  
215 resistance correlation with space, we created Moran's I correlograms as  
216 implemented in PASSaGE 2.0 [20]. Mosquitoes from different collection sites were  
217 considered neighbors if the sites were within 250 meters of each other. We expected  
218 that the  $LC_{50}$ s or kdr frequencies would be associated with geographical distance  
219 (i.e., that closer neighbor sites would show similar resistance levels, compared to  
220 those farther away). A second analysis to test the variation of the  $LC_{50}$ s and kdr  
221 frequencies between and within quadrants using a linear regression model and  
222 ANOVA in R (car package) was conducted. Since the city is uniformly sprayed during  
223 a cycle, we did not expect variation between or within quadrants. Correlation  
224 between kdr frequencies and  $LC_{50}$ 's for permethrin and deltamethrin was tested  
225 using a Spearman test.

226

## 227 **Results**

228 The geographic distributions of the resistance ratios (RR) for each insecticide  
229 in the 26 sites in Tapachula are shown in Fig 1. The  $LC_{50}$  and confidence intervals  
230 for each of the five insecticides are shown in Table S1. For the pyrethroids, we  
231 observed high levels of resistance widespread across sites. Fig 2A shows the  
232 permethrin RRs across Tapachula. High RRs were identified at 24 sites (RR from

233 11.4 to 43.1-fold). Only two sites—NE-3 and NW-2—showed moderate RRs (5.3  
234 and 5.9-fold, respectively). The variation in RRs among quadrants was not significant  
235 ( $F = 0.56$ ,  $df = 3$ ,  $p$  value = 0.64). For deltamethrin, high RRs were determined in all  
236 26 sites (10.6 to 101-fold). The variation among quadrants was not significant ( $F =$   
237 1.08,  $df = 3$ ,  $p$  value = 0.37). Except for SW, all quadrants had at least one site with  
238 RR higher than 90-fold (Fig 2B).

239

240 **Fig 1. Spatial distribution of insecticide resistance to five compounds in *Aedes***  
241 ***aegypti* collected in Tapachula.** The number above each bar corresponds to the  
242 resistance ratio (RR). The RR was calculated relative to the susceptible New Orleans  
243 reference strain. Map obtained from the National Institute of Statistics and  
244 Geography (INEGI). Digital Map of Mexico. MDM: <http://gaia.inegi.org.mx/mdm6>.

245

246 **Fig 2. Pyrethroids resistance ratios (RRs) of *Aedes aegypti* collected in 26 sites**  
247 **across Tapachula in 2018.** A) Permethrin and B) Deltamethrin. Dots represent the  
248  $RR_{50}$  with 95% confidence intervals for each site. Horizontal lines indicate the  
249 threshold for low resistance (< 5-fold), moderate resistance (5- to 10-fold) and high  
250 resistance (> 10-fold).

251

252 The RRs for cholinesterase inhibitors (organophosphates and carbamates)  
253 are shown in Fig 3. For chlorpyrifos (Fig 3A), the RRs varied from low at 10 sites

254 (0.68- to 4.9-fold) to moderate at 15 sites (5.2- to 7.2-fold) to high at one site (10.2-  
255 fold). No significant difference in RRs was found between quadrants ( $F = 1.08$ ,  $df =$   
256  $3$ ,  $p$  value =  $0.37$ ). For malathion (Fig 3B), low resistance (0.86- to 4.5-fold) was  
257 identified at all 26 sites. However, a significant difference was observed between  
258 quadrants ( $F = 3.53$ ,  $df = 3$ ,  $p$  value =  $0.03$ ), with SE showing a mean RR of 2.6-fold  
259 (95% CI 1.9- to 3.2-fold). Resistance to bendiocarb was low (1.2- to 4.8-fold) at 19  
260 sites, moderate (7.3- to 9.9-fold) at five sites, and high (10.3- to 11.2-fold) at two  
261 sites. No difference between quadrants was identified ( $F = 0.68$ ,  $df = 3$ ,  $p$  value =  
262  $0.57$ ).

263

264 **Fig 3. Cholinesterase inhibitors resistance ratios (RRs) of *Aedes aegypti***  
265 **collected in 26 sites across Tapachula in 2018.** A) Chlorpyrifos  
266 (organophosphate), B) Malathion (organophosphate), and C) Bendiocarb  
267 (carbamate). Dots represent the  $RR_{50}$  with 95% confidence intervals for each site.  
268 Horizontal lines indicate the threshold for low resistance ( $< 5$ -fold), moderate  
269 resistance (5- to 10-fold) and high resistance ( $> 10$ -fold).

270

### 271 ***Kdr*-associated mutations**

272 Genotype frequencies at the V1016I and F1534C loci in the voltage-gated  
273 sodium channel gene were determined in a sample of 45-50 individuals from each  
274 site (Table 3). The allele frequencies of the resistant allele I1016 fluctuated from

275 0.16–0.71. The lowest allele frequency (0.16) was scored for NE-3, whereas the  
 276 highest frequency was from NW-6 (0.71). The remaining sites ranged from 0.2 to  
 277 0.5. Except for NE-2 and SW-4, the genotype frequencies at the V1016I loci were  
 278 in HW equilibrium.

279 **Table 3.** Genotype counts and allele frequencies for two *kdr*-associated substitutions  
 280 (V1016I and F1534C) from *Aedes aegypti* collected at 26 sites in Tapachula. RR =  
 281 homozygote resistant, RS = heterozygote, and SS = homozygote susceptible. \*  
 282 indicates a lack of Hardy-Weinberg equilibrium.

| Site | Abv      | N   | V1016I genotypes |           |           | I1016<br>frequency | F1534C genotypes |           |           | C1534<br>frequency |
|------|----------|-----|------------------|-----------|-----------|--------------------|------------------|-----------|-----------|--------------------|
|      |          |     | I/I<br>RR        | V/I<br>RS | V/V<br>SS |                    | C/C<br>RR        | F/C<br>RS | F/F<br>SS |                    |
| NE-1 | Col      | 48  | 4                | 23        | 21        | 0.32               | 47               | 1         | 0         | 0.99               |
| NE-2 | Gal      | 48  | 5                | 30        | 13        | 0.42*              | 39               | 8         | 1         | 0.90               |
| NE-3 | Bar      | 48  | 1                | 13        | 34        | 0.16               | 7                | 22        | 19        | 0.38               |
| NE-4 | SJL      | 48  | 6                | 22        | 20        | 0.35               | 47               | 1         | 0         | 0.99               |
| NE-5 | Coa      | 45  | 5                | 24        | 16        | 0.38               | 42               | 3         | 0         | 0.97               |
| NE-6 | Bon      | 48  | 8                | 22        | 18        | 0.4                | 43               | 5         | 0         | 0.95               |
| NE-7 | CCC      | 50  | 15               | 25        | 10        | 0.55               | 11               | 39        | 0         | 0.61*              |
|      | Subtotal | 335 | 44               | 159       | 132       | 0.37               | 236              | 79        | 20        | 0.82*              |
| SE-1 | Gal      | 48  | 12               | 28        | 8         | 0.54               | 42               | 6         | 0         | 0.94               |
| SE-2 | 16S      | 48  | 5                | 29        | 14        | 0.4                | 48               | 0         | 0         | 1*                 |
| SE-3 | Cal      | 48  | 7                | 25        | 16        | 0.41               | 46               | 2         | 0         | 0.98               |
| SE-4 | BJ1      | 48  | 4                | 28        | 16        | 0.38               | 46               | 2         | 0         | 0.98               |
| SE-5 | BJ2      | 48  | 11               | 25        | 12        | 0.49               | 47               | 1         | 0         | 0.99               |
| SE-6 | Zap      | 48  | 10               | 25        | 13        | 0.47               | 34               | 14        | 0         | 0.85               |
|      | Subtotal | 288 | 49               | 160       | 79        | 0.45               | 263              | 25        | 0         | 0.96               |
| SW-1 | Ray      | 48  | 5                | 28        | 15        | 0.39               | 48               | 0         | 0         | 1*                 |
| SW-2 | Pob      | 48  | 14               | 21        | 13        | 0.51               | 47               | 1         | 0         | 0.99               |
| SW-3 | Pal      | 48  | 2                | 17        | 29        | 0.22               | 46               | 0         | 2         | 0.96*              |
| SW-4 | Nue      | 48  | 0                | 26        | 22        | 0.27*              | 48               | 0         | 0         | 1*                 |
| SW-5 | Pri      | 48  | 8                | 22        | 18        | 0.39               | 47               | 1         | 0         | 0.99               |
| SW-6 | Dem      | 48  | 13               | 20        | 15        | 0.48               | 41               | 7         | 0         | 0.93               |
|      | Subtotal | 288 | 42               | 134       | 112       | 0.38               | 277              | 9         | 2         | 0.98*              |
| NW-1 | 5Fe      | 48  | 9                | 22        | 17        | 0.42               | 48               | 0         | 0         | 1*                 |
| NW-2 | Xo1      | 48  | 10               | 29        | 9         | 0.51               | 48               | 0         | 0         | 1*                 |

|      |          |      |     |     |     |      |      |     |    |       |
|------|----------|------|-----|-----|-----|------|------|-----|----|-------|
| NW-3 | Xo2      | 48   | 1   | 21  | 26  | 0.24 | 48   | 0   | 0  | 1*    |
| NW-4 | Ve1      | 48   | 11  | 23  | 14  | 0.47 | 48   | 0   | 0  | 1*    |
| NW-5 | Ve2      | 50   | 8   | 17  | 25  | 0.33 | 2    | 37  | 11 | 0.41* |
| NW-6 | Par      | 48   | 24  | 20  | 4   | 0.71 | 48   | 0   | 0  | 1*    |
| NW-7 | CNE      | 50   | 4   | 26  | 20  | 0.34 | 0    | 38  | 12 | 0.38* |
|      | Subtotal | 340  | 67  | 158 | 115 | 0.43 | 242  | 75  | 23 | 0.82* |
|      | Total    | 1251 | 202 | 611 | 438 | 0.41 | 1018 | 188 | 45 | 0.89* |

283

284 High allele frequencies of the resistant C1534 allele were determined at 22 of  
285 the 26 sites, ranging from 0.85 to 1.0. Lower frequencies (0.38–0.41) were found in  
286 NE-3, NW-5, and NW-7. While NE-7 was calculated with an intermediate value of  
287 0.61. Most sites were in HW disequilibrium due to fixation of the resistant allele. We  
288 conducted a Spearman correlation test between the pyrethroid LC<sub>50</sub>s and the  
289 expected frequencies of resistant homozygous genotypes. We found significant  
290 correlation coefficients among permethrin LC<sub>50</sub>s, I1016/I1016 homozygotes (S =  
291 2588, rho = 0.53, *p* value = 0.002), and C1534/C1534 homozygotes (S = 1966, rho  
292 = 0.515, *p* value = 0.004). Although it is known that C1534 shows protection only  
293 against permethrin (12), for deltamethrin a significant correlation was observed  
294 between the LC<sub>50</sub> and I1016/I1016 homozygotes (S = 2643, rho = 0.467, *p* value =  
295 0.008) and the C1534/C1534 homozygotes (S = 2945, rho = 0.507, *p* value = 0.002).  
296 However, the significance for both insecticides disappeared when observations from  
297 the New Orleans reference strain were removed.

298 To assess the correlation of LC<sub>50</sub>'s with space, we generated Moran's I  
299 correlograms for each of the five insecticides (Fig 4). The analysis included all 26  
300 collection sites. We did not detect a discernable pattern in any of the tested

301 insecticides. We expected a positive correlation (Moran's I statistically  $> 0$ ) between  
302 nearby sites, then as the distance increased (between the samples) the correlation  
303 would decrease, and later would turn negative (Moran's I statistically  $< 0$ ). However,  
304 this was not observed. Although, few of the distance classes were statistically  
305 different from zero (eg. bendiocarb at 3250 m, 3750 m, 4750 m, and 6250 m;  
306 malathion at 1500 m; and deltamethrin at 3750 m, and 4250 m). A caveat in our  
307 analysis is the possibility that there is autocorrelation at smaller distances than the  
308 ones we selected ( $x < 250$  m). Our experimental design was not geared towards the  
309 detection of spatial correlation at smaller distance; there <sup>5</sup> ~~is~~ <sup>were a</sup> ~~very~~ small number of  
310 samples below 250 meters.

311 **Fig 4. Moran's I correlograms as implemented in PASSaGE 2.0 assessing the**  
312 **correlation of LC<sub>50</sub>'s with space for permethrin (pyrethroid), deltamethrin**  
313 **(pyrethroid), chlorpyrifos (organophosphate), malathion (organophosphate),**  
314 **and bendiocarb (carbamate).** The analysis included 26 collection sites in  
315 Tapachula, Chiapas, Mexico. *Aedes aegypti* mosquitoes from different collection  
316 sites were considered neighbors if the sites were within 250 meters of each other.

317

## 318 Discussion

319 Efforts to control *Ae. aegypti* populations are hindered by widespread  
320 insecticide resistance worldwide. Local insecticide resistance monitoring is  
321 necessary for the design of specific and successful resistance management  
322 programs [21]. In Latin America, pyrethroids have been used for adult mosquito



323 control since the 1990s. The switch to pyrethroids was based on environmental  
324 concerns that led to the use of less toxic classes of insecticides [22]. In Mexico,  
325 vector control programs implemented the use of permethrin in 1999 and continued  
326 their use until 2010. Local selection pressure caused a rapid evolution of pyrethroid  
327 resistance in *Ae. aegypti* across Mexico [9,23-27], resulting in policy modifications  
328 that recommended the use of insecticides with different toxicological modes of  
329 action.

330 In Tapachula, vector control programs replaced the use of permethrin <sup>with</sup> by a  
331 different pyrethroid Type I (d-phenothrin + piperonyl butoxide) from 2010 to 2013. In  
332 2013, pyrethroids were replaced by the organophosphate chlorpyrifos, and in 2017,  
333 by malathion. This study reveals the current status and response of local *Ae. aegypti*  
334 populations to these insecticide shifts. Despite the switch to organophosphates in  
335 the last 5 years, we observed that high levels of pyrethroid resistance remain  
336 widespread in Tapachula. An assumption in insecticide resistance management is  
337 that insecticide resistance has negative fitness costs. Therefore, when insecticide  
338 pressure is removed, populations are expected to reverse to susceptibility [28,29].  
339 Currently, we are conducting a study to determine the degree of loss of resistance  
340 to pyrethroids from 2016 to 2020 in this study area, which will demonstrate whether  
341 mosquito populations in Tapachula are undergoing a process of decreasing  
342 resistance that will take several years. Another explanation is that pyrethroid  
343 resistance is maintained in *Ae. aegypti* populations by the domestic use of  
344 pyrethroids [30]. Surveys in Merida, Mexico, indicate that 85% of households took



345 action to kill pests, and 89% exclusively targeted mosquitoes. Interestingly most of  
346 the aerosol spray cans contained pyrethroid insecticides [31].

347 Interestingly, RRs for deltamethrin—a Type II pyrethroid—were higher than  
348 permethrin RRs across sites. Deltamethrin was authorized by CENAPRECE for  
349 indoor residual use in 2009 for control of the malaria vector, but its use was restricted  
350 to rural areas. Therefore, direct selection pressure from the use of deltamethrin in  
351 public health is unlikely to be responsible for the high RRs in *Ae. aegypti* from  
352 Tapachula. Although all pyrethroids act at the same target site, the variability of  
353 resistance to their different types is attributed to different binding sites for pyrethroids  
354 Type I and Type II at the voltage-gated sodium channel. Additionally, the presence  
355 of enzymes that have a greater affinity to metabolize specific molecules within the  
356 same toxicological group might explain this variability [32].

357 Knockdown resistance (*kdr*) is a major mechanism of pyrethroid resistance in  
358 *Ae. aegypti* from Mexico. In this study, we measured the frequency of this  
359 mechanism by molecular tests that identify mutations that confer changes to amino  
360 acids in the VGSC. The allele frequencies of the resistant allele I1016 ranged from  
361 0.4 to 0.7, and for the resistant allele C1534, from 0.85 to 1.0 (except for three sites  
362 that had ~0.4). Historical data of *kdr* mutations indicated that C1534 confers low level  
363 of resistant on its own, and that resistance increased dramatically when I1016  
364 evolved from the V1,016/C1,534 haplotype in field mosquito collected in different  
365 places from Mexico (33). Those results demonstrated that I1016 was unlikely to have  
366 evolved independently, and that both mutations need coexist in the same mosquito  
367 in order to confer higher levels of resistance. Moderate correlations were significant

368 between the resistant allele frequencies and the RRs for permethrin and  
369 deltamethrin only when including the New Orleans datapoints. This significance  
370 might be explained by most of the allele frequencies being distributed within a small  
371 range of variability.

372 This study was conducted after chlorpyrifos had been used for 5 years in  
373 outdoor spraying by vector control programs. Our results provide evidence of the  
374 response of *Ae. aegypti* populations to chlorpyrifos pressure. Ten sites showed low  
375 RRs, 15 sites showed moderate resistance, and one site was highly resistant.  
376 Interestingly, *Ae. aegypti* from all 26 sites were susceptible or had low RRs to  
377 malathion, thereby indicating that resistance to chlorpyrifos does not predict the lack  
378 of effectivity of malathion. Additionally, the RRs to bendiocarb were variable:  
379 mosquitoes from 19 sites had low RRs, those from three were moderate, and those  
380 from two were highly resistant. Only a few sites showed moderate to high resistance  
381 to both chlorpyrifos and bendiocarb (NE-5, NW-6, and SE-4). The lack of cross-  
382 resistance between organophosphates and carbamates suggests that the resistance  
383 mechanisms are not due to the insensitivity of their target site (the  
384 acetylcholinesterase) [34] that in fact no mutations have been found in *ace-1* gene  
385 in *Aedes aegypti* [35].

386 A survey in Veracruz, Mexico, identified high RRs to chlorpyrifos in  
387 Cosoleacaque (RR = 13.9), moderate RRs in Poza Rica (RR = 7.9), and low RRs in  
388 five sites in Veracruz [36]. By using a discriminating dose of 50 µg/bottle and 85  
389 µg/bottle for 30 minutes, two additional studies were able to identify chlorpyrifos  
390 resistance in Mexico [26,37]. Since neither of these studies found a history of

391 chlorpyrifos use in vector control programs, the resistance might be explained by  
392 indirect exposure to chlorpyrifos through the extensive use of this insecticide to  
393 control agricultural pests [36].

394 During vector control programs, the city of Tapachula is uniformly sprayed,  
395 using the same insecticide, frequency and intensity. More yet, we selected sites  
396 based in their accessibility to spraying-vehicles. Assuming that no spatial  
397 heterogeneity in frequency and intensity of spraying, we did not expect the high  
398 levels of variation in resistance profiles across <sup>the</sup> ~~de~~ city. For example, significant  
399 heterogeneity in the frequency of kdr haplotypes was detected in *Ae. ~~aegypti~~*<sup>aegypti</sup>  
400 collected between city blocks in a town of Yucatan, suggesting that selection for  
401 these haplotypes occurs at a fine spatial scale <sup>[37]</sup> ~~(37 GROSSMAN)~~. However, in  
402 contrast to our study, insecticide application was highly variable in space and time,  
403 creating a mosaic of selection pressures. In our study, some sources of  
404 heterogeneity could occur from mosquito migration from untreated sites due to  
405 vehicle inaccessibility, including parks, cemeteries, steep and unpaved streets. A  
406 second source of insecticide pressure is by use of household aerosol insecticides.  
407 For example, in a previous study from Merida, Mexico approximately 87% of  
408 households used commercially available pyrethroid products to control mosquitoes  
409 in their homes. Future studies should include an assessment of this source of  
410 selection pressure in Tapachula.

411 The spatial variability in insecticide resistance observed across the 26 sites in  
412 Tapachula is likely associated <sup>with</sup> the presence or appearance of “hot spots or dengue  
413 foci,” which contribute to the persistent transmission of the diseases and therefore

414 to focal areas with greater spray intervention [38]. In addition, the spatial variability  
415 of resistance highlights the importance of evaluating resistance in multiple sites  
416 within a defined geographic area for the application of appropriate vector control  
417 decisions. Although no geographical correlation/association/pattern between  
418 resistance was found in Tapachula, more specific and finer environmental  
419 characteristics must not be discarded in future studies. A previous study used  
420 mitochondrial ND4 haplotypes to determine gene flow patterns among 38 *Ae.*  
421 *aegypti* coastal collections in Mexico (39). Three genetic clusters were identified, the  
422 Northeast, Pacific, and Yucatan peninsula. For all sites, genetic distances remained  
423 small below geographic distances of 90 km and became large at distances >150 km.  
424 The Pacific cluster had the highest gene flow and diversity. A second study in the  
425 Yucatan Peninsula showed high gene flow occurring across 27 *Ae. aegypti* collection  
426 sites located up to 150 km of distance. Single nucleotide polymorphism (SNPs) at  
427 eleven loci did not vary across sites, suggesting high levels of gene flow. In contrast,  
428 insecticide resistance loci, including *kdr* alleles (I1016 and C1534) were highly  
429 variable across sites, indicating that insecticide resistance offsets the homogenizing  
430 effects of gene flow (40). In this study, we assume complete gene flow among  
431 collection sites because: 1) Tapachula belongs to the Pacific cluster, 2) *Ae. aegypti*  
432 is well established throughout the year and, 3) collection sites are within 10 km of  
433 distance. However, this remains to be tested.

434

## 435 **Conclusion**



436           Despite more than 5 years having passed since the removal of pyrethroids  
437 from vector control programs in Tapachula, high levels of pyrethroid resistance and  
438 *kdr*-associated alleles persist in *Ae. aegypti* populations. Future resistance surveys  
439 will reveal if pyrethroid resistance is maintained in mosquito populations. We  
440 observed that, after 5 years of chlorpyrifos use in vector control programs, more than  
441 50% of the sites have moderate to high chlorpyrifos resistance but complete  
442 susceptibility to malathion. Since malathion was introduced later in 2017, future  
443 studies to evaluate the selection of malathion resistance in the field are needed. Two  
444 different ~~analysis~~ <sup>analyses</sup> were conducted 1) the spatial analysis included all 26 sites and, 2)  
445 the quadrant analysis to identify operational sources of heterogeneity. The quadrant  
446 analysis doesn't include a geographical component and has limitations. Insecticide  
447 resistance varied spatially, most likely as a consequence of the pattern of insecticide  
448 use combined with environmental factors. Based on the results of our study, we  
449 suggest that both of the studied organophosphates and the carbamate remain viable  
450 options for use in the control strategy for this vector. The return to a pyrethroid (at  
451 least permethrin and deltamethrin) for outdoor spraying is recommended when the  
452 levels of resistance have decreased to RR less than 10-fold and once mechanisms  
453 other than *kdr* have been elucidated for pyrethroid resistance.

#### 454 Acknowledgments

455 The authors would like to thank Biol. Elsa Contreras, Geovanni Vázquez and  
456 Francisco Pozos from the Programme of Vector Control in Tapachula for  
457 contributions in the field work.

459 **References**

- 460 1. Amelia-Yap ZH, Chen CD, Sofian-Azirun M, Low VL. Pyrethroid resistance in  
461 the dengue vector *Aedes aegypti* in Southeast Asia: present situation and  
462 prospects for management. *Parasit Vectors*. 2018;11(1):332. Available from:  
463 <https://doi.org/10.1186/s13071-018-2899-0>.
- 464 2. Roiz D, Wilson AL, Scott TW, Fonseca DM, Jourdain F, Muller P, et al.  
465 Integrated *Aedes* management for the control of *Aedes*-borne diseases.  
466 *PLoS Negl Trop Dis*. 2018;12: e0006845. Available from:  
467 <https://doi.org/10.1371/journal.pntd.0006845>.
- 468 3. Bisset JA, Rodriguez MM, San Martín JL, Romero JE, Montoya R. Evaluación  
469 de la resistencia a insecticidas de una cepa de *Aedes aegypti* de El Salvador.  
470 *Rev. Panam. Salud Pública*. 2009;26:229-234. Available from:  
471 [https://iris.paho.org/bitstream/handle/10665.2/9778/07.pdf?sequence=1&isA  
472 llowed=y](https://iris.paho.org/bitstream/handle/10665.2/9778/07.pdf?sequence=1&isAllowed=y)
- 473 4. Norma oficial mexicana NOM-032-SSA-2002, para la vigilancia  
474 epidemiológica, prevención y control de enfermedades transmitidas por  
475 vector. México: Secretaría de Salud. 2002. Available from:  
476 <http://www.salud.gob.mx/unidades/cdi/nom/032ssa2002.html>.
- 477 5. Centro Nacional de Programas Preventivos y Control de Enfermedades  
478 (CENAPRECE). Monitoreo de Resistencia a Insecticidas (adulticidas)  
479 Utilizados en el Programa Nacional de Control de Vectores en México. 2014.  
480 Available from:

- 481 <http://www.cenaprece.salud.gob.mx/programas/interior/vectores/descargas/>  
482 [pdf/MonitoreoResistencialInsecticidas2014.pdf](http://www.cenaprece.salud.gob.mx/programas/interior/vectores/descargas/pdf/MonitoreoResistencialInsecticidas2014.pdf).
- 483 6. World Health Organization WHO. Report of the WHO world health statistics.  
484 monitoring health for the sustainable development goals (SDGs). 2016.  
485 Available from:  
486 [https://www.who.int/gho/publications/world\\_health\\_statistics/2016/Annex B/](https://www.who.int/gho/publications/world_health_statistics/2016/Annex_B/en/)  
487 [en/](https://www.who.int/gho/publications/world_health_statistics/2016/Annex_B/en/).
- 488 7. Soderlund DM, & Bloomquist JR. Molecular mechanisms of insecticide  
489 resistance. *Pest Resist Arthropods*. 1990;13:58–96. Available from:  
490 [http://doi.org/10.1007/978-1-4684-6429-0\\_4](http://doi.org/10.1007/978-1-4684-6429-0_4).
- 491 8. Dong K, Du Y, Rinkevich F, Nomura Y, Xu P, Wang L, et al. Molecular biology  
492 of insect sodium channels and pyrethroid resistance. *Insect Biochem Mol Biol*.  
493 2014;50:1–17. Available from:  
494 <https://www.ncbi.nlm.nih.gov/pmc/articles/PMC4484874/>
- 495 9. Saavedra-Rodriguez K., Urdaneta-Marquez L, Rajatileka S, Moulton M,  
496 Flores AE, Fernandez-Salas, et al. A mutation in the voltage-gated sodium  
497 channel gene associated with pyrethroid resistance in Latin American *Aedes*  
498 *aegypti*. *Insect Mol Biol*. 2007;16(6):785–798. Available from:  
499 <https://onlinelibrary.wiley.com/doi/pdf/10.1111/j.1365-2583.2007.00774.x>.
- 500 10. Yanola J, Somboon P, Walton C, Nachaiwieng W, Somwang P,  
501 Prapanthadara L. High-throughput assays for detection of the F1534C  
502 mutation in the voltage-gated sodium channel gene in permethrin-resistant  
503 *Aedes aegypti* and the distribution of this mutation throughout Thailand. *Trop*  
504 *Med Int Health*. 2011;16(4):501–509. Available from:



- 505 <http://doi.org/10.1111/j.1365-3156.2011.02725.x>.
- 506 11. Haddi K, Tome HVV, Du Y, Valbon WR, Nomura Y, Martins GF, et al.  
507 Detection of a new pyrethroid resistance mutation (V410L) in the sodium  
508 channel of *Aedes aegypti*: a potential challenge for mosquito control. *Sci Rep*.  
509 2017;7:46549. Available from: <https://doi.org/10.1038/srep46549>.
- 510 12. Saavedra-Rodriguez K, Maloof FV, Campbell CL, Garcia-Rejon J, Lenhart A,  
511 Penilla P, et al. Parallel evolution of vgsc mutations at domains IS6, IIS6 and  
512 IIIS6 in pyrethroid resistant *Aedes aegypti* from Mexico. *Sci Rep-UK*. 2018;8:  
513 6747. Available from: <https://www.nature.com/articles/s41598-018-25222-0>
- 514 13. Plan de acción. Tapachula, México. 2018. Programa Ciudades Emergentes  
515 y Sostenibles (CES). 2018. Available from:  
516 [https://www.iadb.org/es/desarrollo-urbano-y-vivienda/programa-ciudades-](https://www.iadb.org/es/desarrollo-urbano-y-vivienda/programa-ciudades-emergentes-y-sostenibles)  
517 [emergentes-y-sostenibles](https://www.iadb.org/es/desarrollo-urbano-y-vivienda/programa-ciudades-emergentes-y-sostenibles).
- 518 14. Boletín epidemiológico. Sistema Nacional de Vigilancia Epidemiológica.  
519 Sistema Único de Información. Dirección General de Epidemiología.  
520 Secretaría de Salud, Mexico. 2019. Available from:  
521 <https://www.gob.mx/cms/uploads/attachment/file/451550/sem13.pdf>
- 522 15. Guía Metodológica para la Vigilancia Entomológica con Ovitrampas. Centro  
523 Nacional de Programas Preventivos y Control de Enfermedades  
524 (CENAPRECE). Secretaría de Salud, Mexico City. 2015. Available from:  
525 [https://www.gob.mx/cms/uploads/attachment/file/354685/Guia\\_Metodologic](https://www.gob.mx/cms/uploads/attachment/file/354685/Guia_Metodologica_a_para_Vigilancia_Entomologica_con_Ovitrampas.pdf)  
526 [a\\_para\\_Vigilancia\\_Entomologica\\_con\\_Ovitrampas.pdf](https://www.gob.mx/cms/uploads/attachment/file/354685/Guia_Metodologica_a_para_Vigilancia_Entomologica_con_Ovitrampas.pdf).
- 527 16. Brogdon WG, Chan A. Instrucciones para la evaluación de la resistencia a  
528 insecticida en vectores mediante el ensayo biológico de la -botella de la CDC.



553 g.pdf;jsessionid=28BBB4AE1572C138ABC8A62931DBA9F6?sequence=1

554 22. Macoris ML, Andrighetti MT, Macoris O, Vanessa C G, Carvalho, Lídia RC,  
555 et al. Association of insecticide use and alteration on *Aedes aegypti*  
556 susceptibility status. Memórias do Instituto Oswaldo Cruz. 2007;102(8):895-  
557 900. <https://doi.org/10.1590/S0074-02762007000800001>.

558 23. Garcia GP, Flores AE, Fernandez-Salas I, Saavedra-Rodriguez K, Reyes-  
559 Solis G, Lozano-Fuentes S, et al. Recent rapid rise of a permethrin knock  
560 down resistance allele in *Aedes aegypti* in Mexico. PLoS Negl Trop Dis.  
561 2009;3(10):e531. Available from:  
562 <https://doi.org/10.1371/journal.pntd.0000531>

563 24. Flores AE, Ponce G, Silva BG, Gutierrez SM, Bobadilla C, Lopez B, et al.  
564 Wide spread cross resistance to pyrethroids in *Aedes aegypti* (Diptera:  
565 Culicidae) From Veracruz state Mexico. J Econ Entomol. 2013;106(2):959–  
566 969. doi: 10.1603/ec12284. PMID: 23786088; PMCID: PMC3980443.  
567 Available from: <https://pubmed.ncbi.nlm.nih.gov/23786088/>

568 25. Aponte HA, Penilla RP, Dzul-Manzanilla F, Che-Mendoza A, López AD, Solis  
569 F, et al. The pyrethroid resistance status and mechanisms in *Aedes aegypti*  
570 from the Guerrero state, Mexico. Pest Biochem and Phys. 2013;107(2):226–  
571 234. Available from: <http://doi.org/10.1016/j.pestbp.2013.07.005>.

572 26. Kuri-Morales PA, Correa-Morales F, González-Acosta C, Moreno-Garcia M,  
573 Santos-Luna R, Román-Pérez S, et al. Insecticide susceptibility status in  
574 Mexican populations of *Stegomyia aegypti* (= *Aedes aegypti*): a nationwide  
575 assessment. Med Vet Entomol. 2018;32(2):162–174. Available from:  
576 <https://doi.org/10.1111/mve.12281>.

- 577 27. López-Solís A, Castillo-Vera A, Cisneros J, Solís-Santoyo F, Penilla-Navarro  
578 R, Black IV W, et al. (2020). Resistencia a insecticidas en *Aedes aegypti* y  
579 *Aedes albopictus* (Diptera: Culicidae) de Tapachula, Chiapas, México Salud  
580 Pública de México. 2020;62:439-446. Available from:  
581 <http://dx.doi.org/10.21149/10131>.
- 582 28. Vera-Maloof FZ, Saavedra-Rodriguez K, Penilla-Navarro RP, Rodriguez-  
583 Ramirez A, Dzul F, Manrique-Saide P et al. Loss of pyrethroid resistance in  
584 newly established laboratory colonies of *Aedes aegypti*. Plos Negl Trop Dis.  
585 2020;14(3): Available from: <https://doi.org/10.1371/journal.pntd.0007753>.
- 586 29. Deming R, Manrique-Saide P, Medina Barreiro A, Cardeña EU, Che-  
587 Mendoza A, Jones B, et al. Spatial variation of insecticide resistance in the  
588 dengue vector *Aedes aegypti* presents unique vector control challenges.  
589 Parasit Vectors. 2016;9:67. Available from: [https://doi.org/10.1186/s13071-  
590 016-1346-3](https://doi.org/10.1186/s13071-016-1346-3).
- 591 30. Gray L, Sergio DF, Anuar MB, Vadillo-Sánchez J, González-Olvera G,  
592 Lenhart A, et al. Experimental evaluation of the impact of household  
593 aerosolized insecticides on pyrethroid resistant *Aedes aegypti*. Sci Rep.  
594 2018;8:12535. Available from: <https://www.ncbi.nlm.nih.gov/pmc/articles/PMC6105583/>.
- 595
- 596 31. Loroño-Pino MA, Chan-Dzul YN, Zapata-Gil R, Carrillo-Solís C, Uitz-Mena A,  
597 García-Rejón JE, et al. Household use of insecticide consumer products in a  
598 dengue-endemic area in México. Trop Med & Int Health. 2014;19(10):1267-  
599 127. Available from: <https://doi.org/10.1111/tmi.12364>.
- 600 32. Nardini L, Christian RN, Coetzer N, Ranson H, Coetzee M, Koekemoer LL.

601 Detoxification enzymes associated with insecticide resistance in laboratory  
602 strains of *Anopheles arabiensis* of different geographic origin. Parasit  
603 Vectors. 2012;5:113. doi:10.1186/1756-3305-5-113. PMID: 22676389.  
604 Available from: <https://www.ncbi.nlm.nih.gov/pmc/articles/PMC3430573/>

605 33. Vera-Maloof FZ, Saavedra-Rodriguez K, Elizondo-Quiroga AE, Lozano-  
606 Fuentes S, Black IV WC. Coevolution of the Ile1,016 and Cys1,534 mutations  
607 in the voltage gated sodium channel gene of *Aedes aegypti* in Mexico. PLoS  
608 Negl Trop Dis. 2020;9(12): e0004263. Available from:  
609 <https://doi.org/10.1371/journal.pntd.0004263>.

610 34. Mutero A, Pralavorio M, Bride JM, & Fournier D. Resistance-associated point  
611 mutations in insecticide-insensitive acetylcholinesterase. Proc Nat Acad Sci  
612 USA. 1994;91(13):5922–5926. Available from:  
613 <https://doi.org/10.1073/pnas.91.13.5922>.

614 35. Weill, M., A. Berthomieu, C. Berticat, G. Lutfalla, V. Nègre, N. Pasteur, A.  
615 Philips, J. Leonetti, P. Fort and M. Raymond. "Insecticide resistance: a silent  
616 base prediction." *Current Biology*. 2004;14(14): R552-R553. Available from:  
617 [https://www.cell.com/current-biology/pdf/S0960-9822\(04\)00486-5.pdf](https://www.cell.com/current-biology/pdf/S0960-9822(04)00486-5.pdf)

618 36. Lopez B, Ponce G, Gonzalez JA, Gutierrez SM, Villanueva OK, Gonzalez G.  
619 Susceptibility to chlorpyrifos in pyrethroid-resistant populations of *Aedes*  
620 *aegypti* (Diptera: Culicidae) from Mexico. J Med Entomol. 2014;51(3):644–  
621 649. Available from: <https://doi.org/10.1603/me13185>.

622 37. Grossman MK, Rodriguez J, Barreiro AM, Lenhart A, Manrique-Saide P,  
623 Vazquez-Prokopec GM. Fine-scale spatial and temporal dynamics of kdr  
624 haplotypes in *Aedes aegypti* from Mexico. Parasit Vectors. 2019;12:1:20.

625 Pmid: 30626410; PubMed Central PMCID: PMC6327429. Available from:  
626 [https://parasitesandvectors.biomedcentral.com/articles/10.1186/s13071-](https://parasitesandvectors.biomedcentral.com/articles/10.1186/s13071-018-3275-9)  
627 [018-3275-9](https://parasitesandvectors.biomedcentral.com/articles/10.1186/s13071-018-3275-9)

628 38. Opondo KO, Weetman D, Jawara M, Diatta M, Fofana A, Crombe F, et al.  
629 Does insecticide resistance contribute to heterogeneities in malaria  
630 transmission in The Gambia? *Malar J.* 2016;15(15):166. doi:  
631 [10.1186/s12936-016-1203-z](https://doi.org/10.1186/s12936-016-1203-z). PMID: 26980461; PMCID: PMC4793517.  
632 Available from: <https://pubmed.ncbi.nlm.nih.gov/26980461/>

633 39. Gorrochotegui-Escalante N, Gomez-Machorro C, Lozano S, Fernandez Salas  
634 I, Munoz ML, Farfan-Ale J, Garcia-Rejon, J, Beaty B, Black W. Breeding  
635 structure of *Aedes aegypti* populations in Mexico varies by region. *Am J Trop*  
636 *Med Hyg.* 2002;66. 213-22. [10.4269/ajtmh.2002.66.213](https://doi.org/10.4269/ajtmh.2002.66.213).

637 40. Saavedra-Rodriguez K, Beaty M, Lozano-Fuentes S, Denham S, Garcia-  
638 Rejon J, Reyes-Solis G, Machain-Williams C, Loroño-Pino MA, Flores-Suarez  
639 A, Ponce-Garcia G, Beaty B, Eisen L, and Black WCIV. Local evolution of  
640 pyrethroid resistance offsets gene flow among *Aedes aegypti* collections in  
641 Yucatan state, Mexico. *Am J Trop Med Hyg.* 2015;92(1):201-209. Available  
642 from: <https://doi.org/10.4269/ajtmh.14-0277>

643

644

645

646

647 Supplementary Tables

648 **Table S1. Lethal concentration to kill 50% (LC<sub>50</sub>) for five insecticides at 26**

649 ***Aedes aegypti* sites in Tapachula, Chiapas, Mexico.** The LC<sub>50</sub> is in micrograms  
650 (µg) of active ingredient per bottle. The 95% confidence intervals around the LC<sub>50</sub>  
651 are enclosed in parentheses. *p* values higher than 0.05 indicate the observed data  
652 fit the binary logistic regression model.

653

654 **Table S2. Genotype for two *kdr*-associated substitutions (V1016I and F1534C)**

655 **per individual *Aedes aegypti* mosquito (n = 47 to 50) at 26 sites in Tapachula,**

656 **Chiapas, Mexico.** For V1016I: AA = homozygote for Ile<sub>1016</sub>, resistant; GG =

657 homozygote for Val<sub>1016</sub>, susceptible; AG = heterozygote Ile<sub>1016</sub>/Val<sub>1016</sub>. For F1534C:

658 TT homozygote for Phe<sub>1534</sub>, susceptible; GG = homozygote for Cys<sub>1534</sub>, resistant;

659 TG = heterozygote Phe<sub>1534</sub>/Cys<sub>1534</sub>.

660





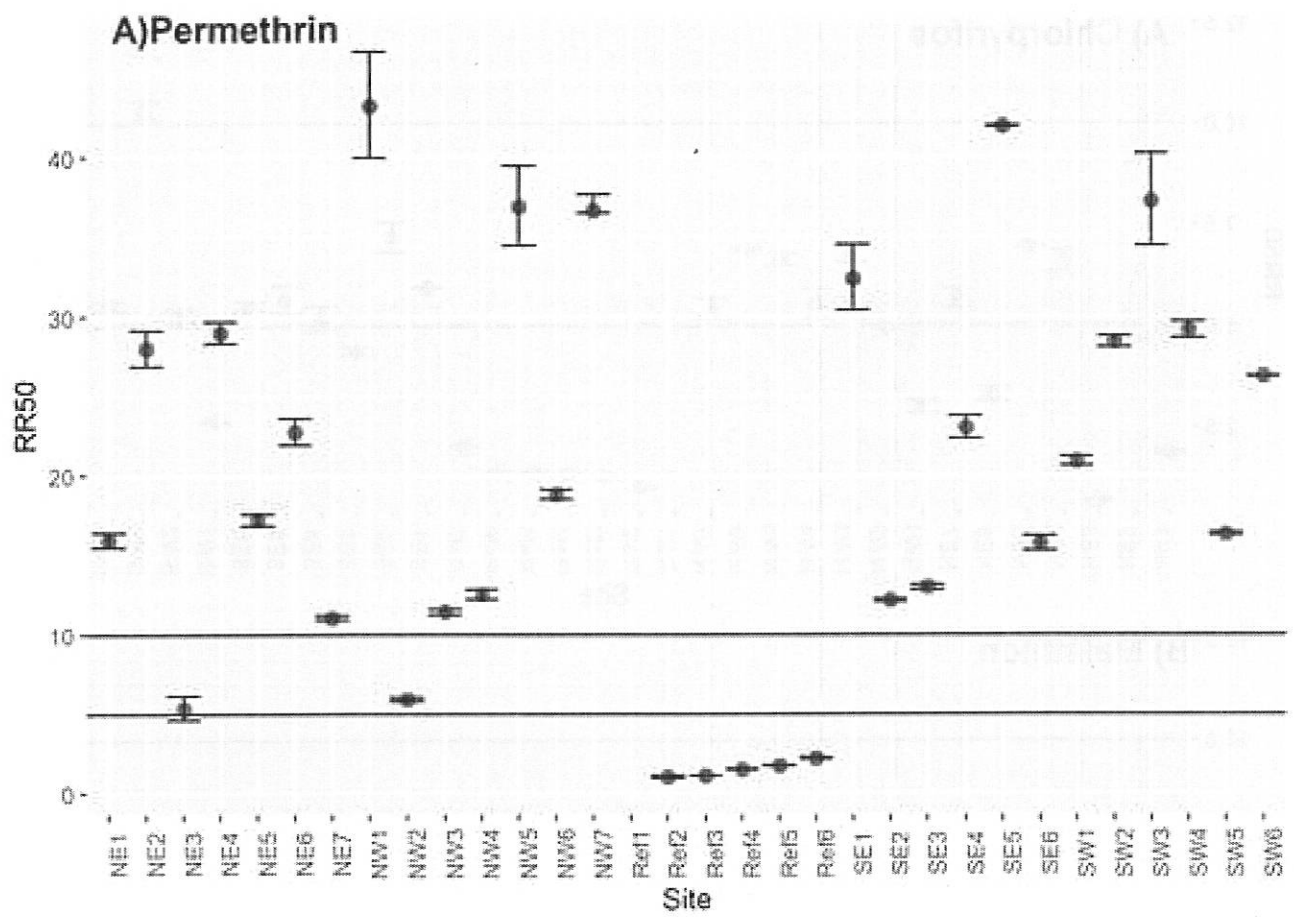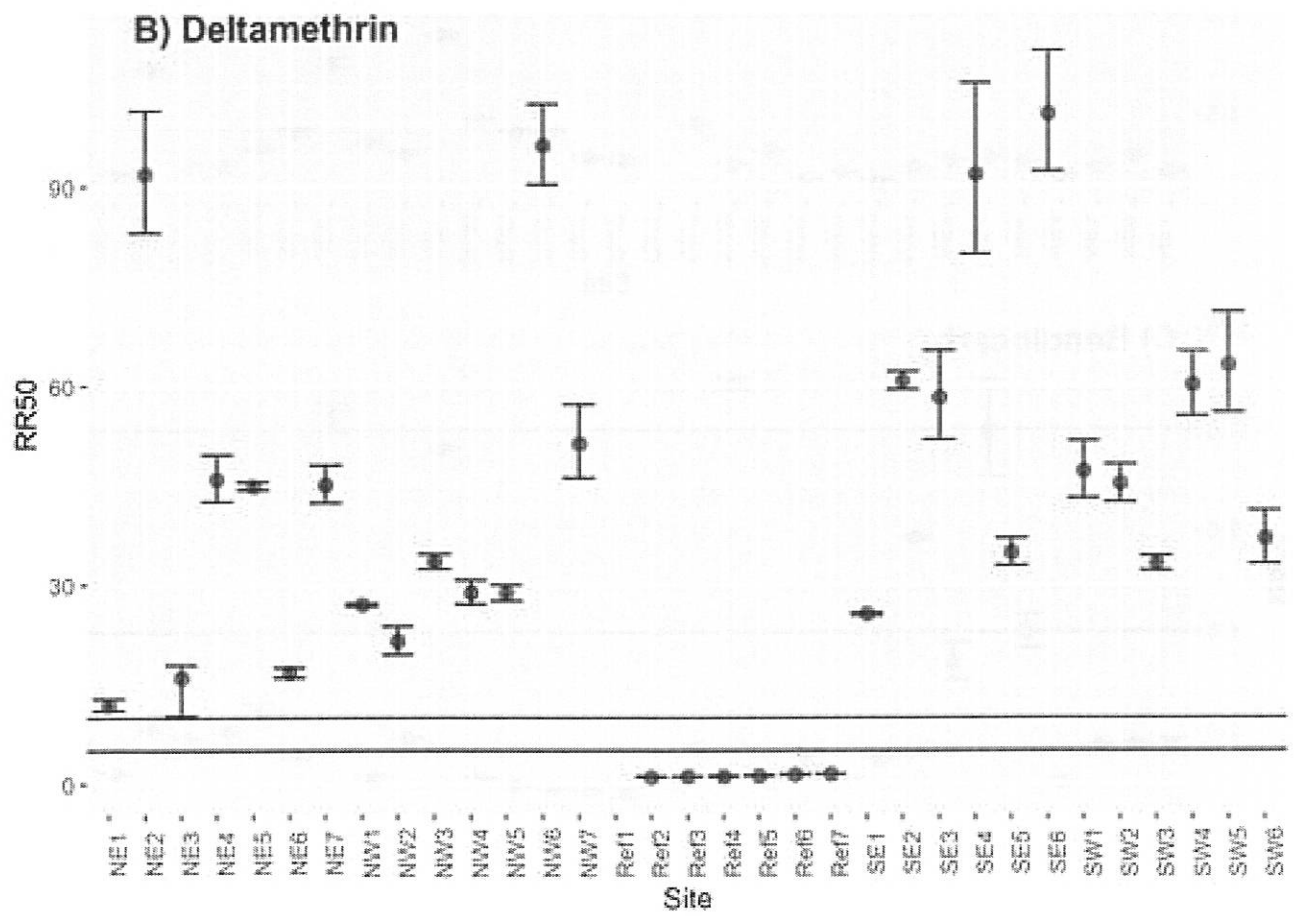

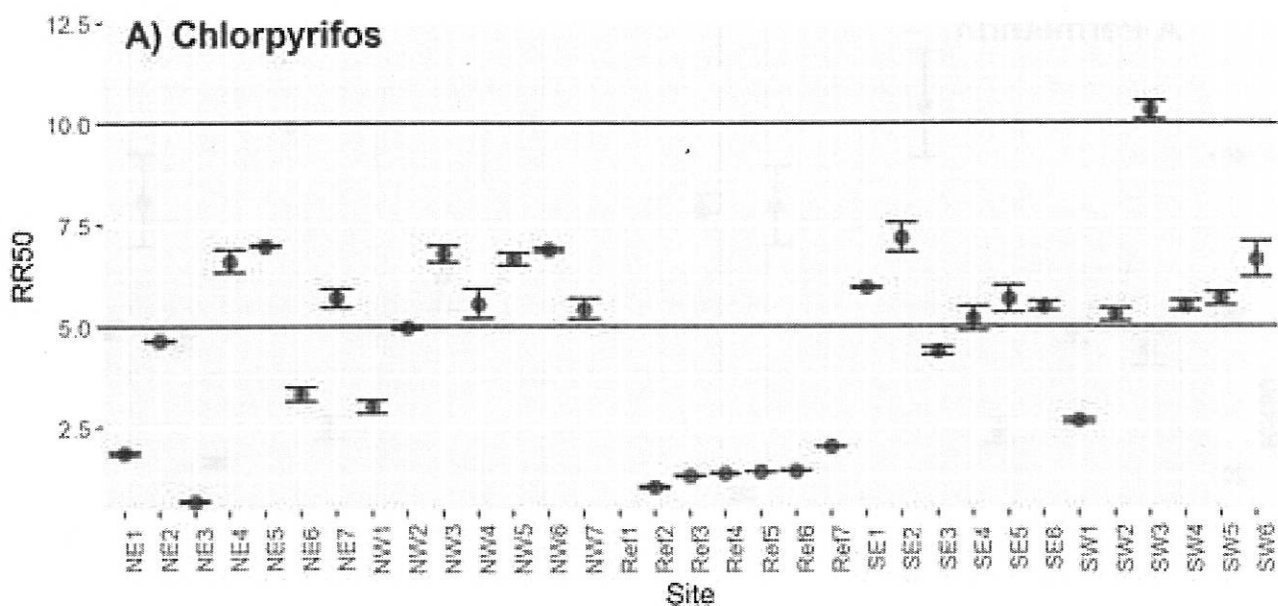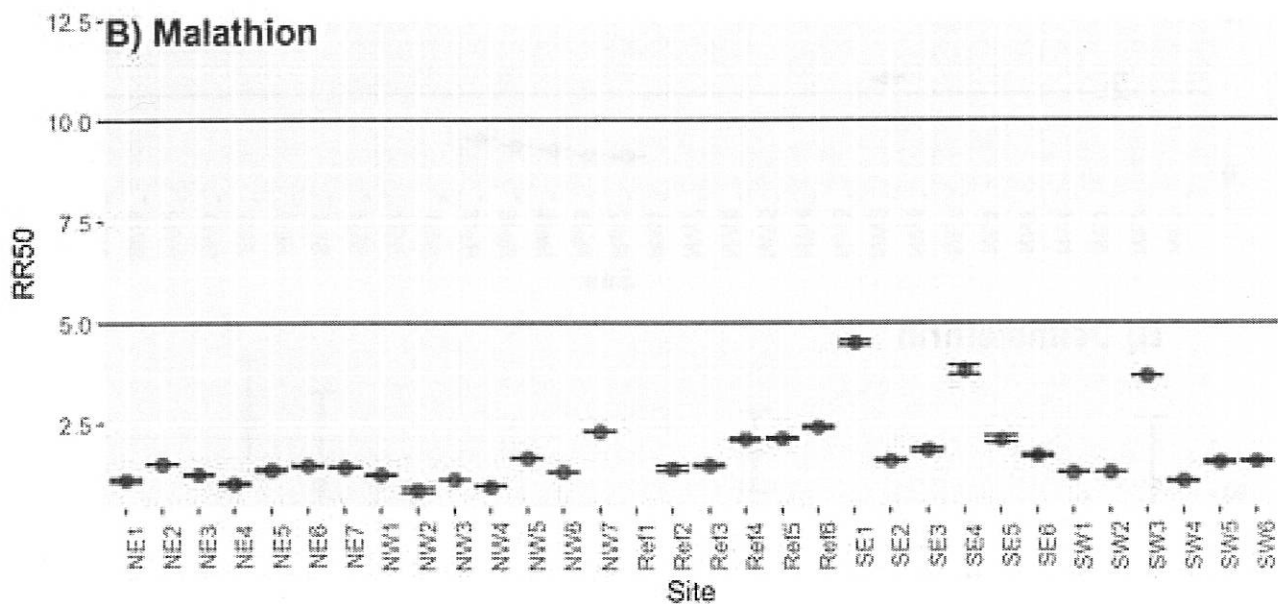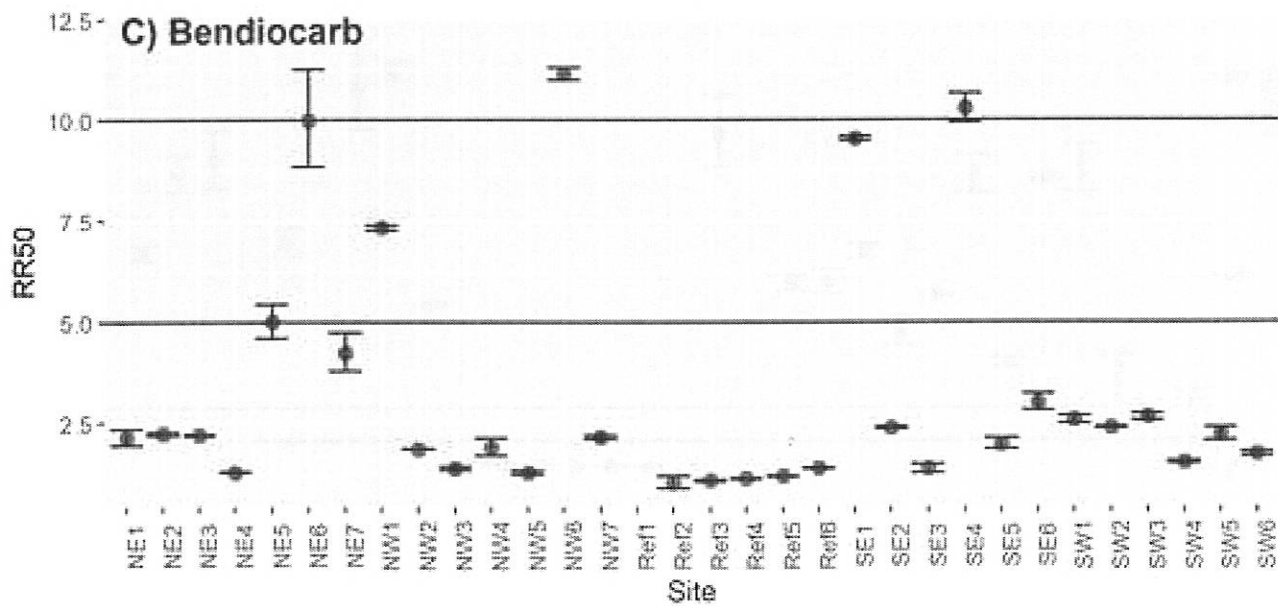

Figure 4

[Click here to access/download;Figure;Fig 4\\_PACE.tif](#)

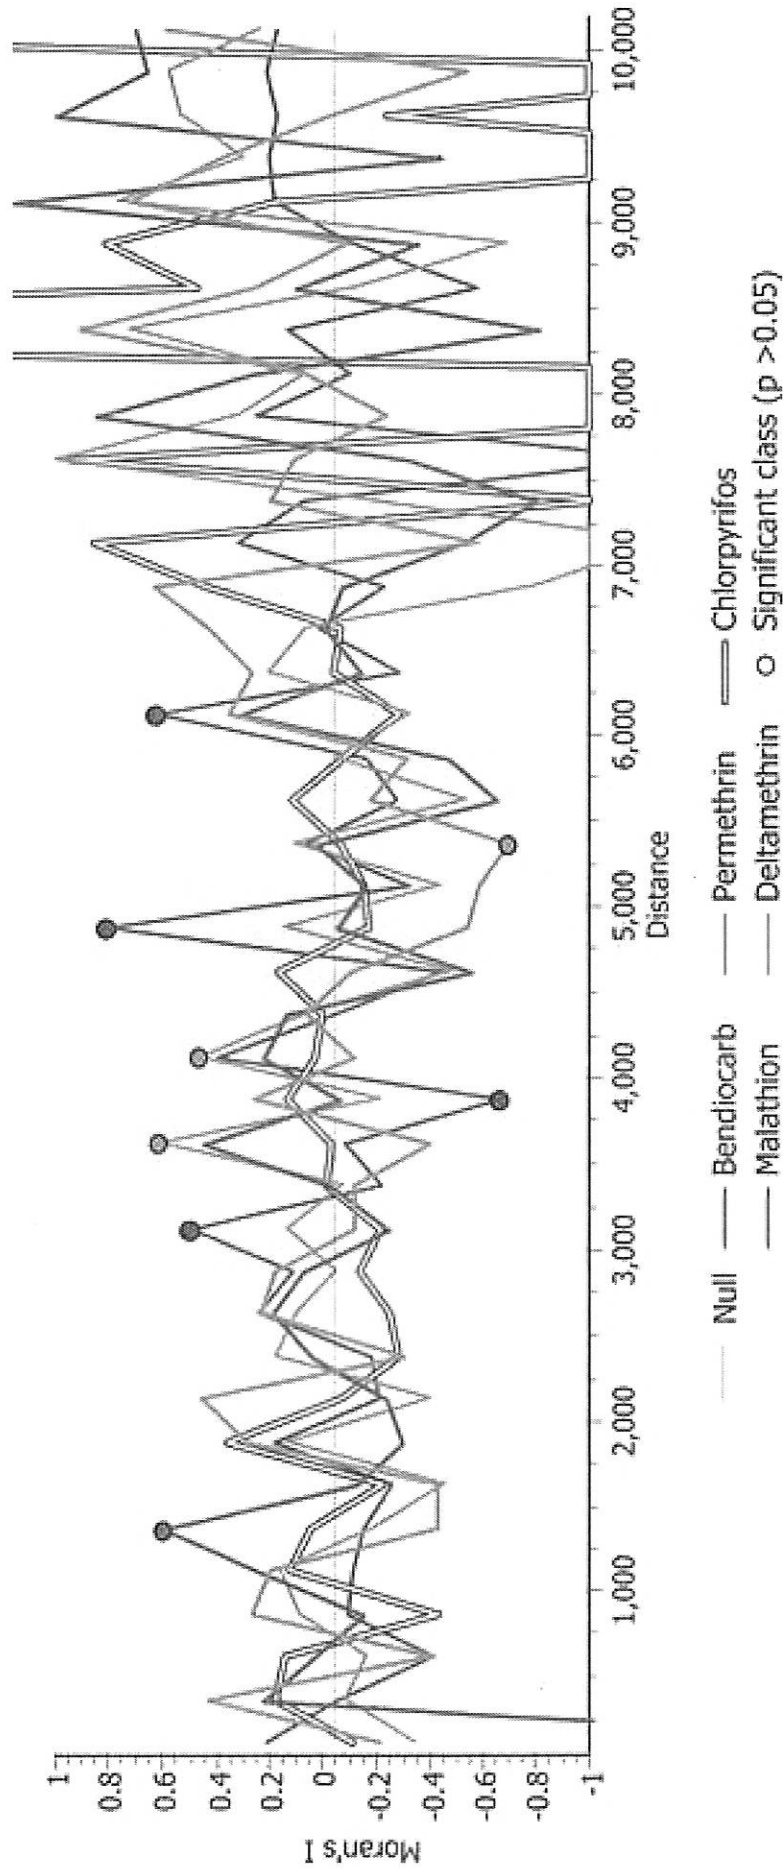

Supplement: pntd.0009746.s004.pdf [file pntd.0009746.s004.pdf]
